# Supplementary material for: Virulence Determinants and Plasmid-Mediated Colistin Resistance mcr Genes in Gram-Negative Bacteria Isolated From Bovine Milk
Source: Front Cell Infect Microbiol. 2021 Nov 23;11:761417. doi: 10.3389/fcimb.2021.761417 (PMC8650641; doi:10.3389/fcimb.2021.761417)
Supplement: Supplementary file 4 [file Table_2.xlsx]

## Sheet: Sheet 1
Supplementary Table 2A: Correlation analysis for antimicrobial resistance phenotypes, colistin resistance genes (mcr) and virulence genes in E. coli isolates
	CN	TOB	FOX	CTX	CRO	FEP	NA	CIP	LVX	SXT	TGC	ATM	TPZ	AMC	CHL	FOF	TET	mcr1	mcr2	mcr3	mcr4	hlyF	ireA	iroN	iss	traT
CN	1	#N/A	#N/A	#N/A	#N/A	#N/A	#N/A	#N/A	#N/A	#N/A	#N/A	#N/A	#N/A	#N/A	#N/A	#N/A	#N/A	#N/A	#N/A	#N/A	#N/A	#N/A	#N/A	#N/A	#N/A	#N/A
TOB	-0.0764719	1	#N/A	#N/A	#N/A	#N/A	#N/A	#N/A	#N/A	#N/A	#N/A	#N/A	#N/A	#N/A	#N/A	#N/A	#N/A	#N/A	#N/A	#N/A	#N/A	#N/A	#N/A	#N/A	#N/A	#N/A
FOX	-0.688247	0.0526316	1	#N/A	#N/A	#N/A	#N/A	#N/A	#N/A	#N/A	#N/A	#N/A	#N/A	#N/A	#N/A	#N/A	#N/A	#N/A	#N/A	#N/A	#N/A	#N/A	#N/A	#N/A	#N/A	#N/A
CTX	0.0764719	0.0526316	-0.0526316	1	#N/A	#N/A	#N/A	#N/A	#N/A	#N/A	#N/A	#N/A	#N/A	#N/A	#N/A	#N/A	#N/A	#N/A	#N/A	#N/A	#N/A	#N/A	#N/A	#N/A	#N/A	#N/A
CRO	0.509175	-0.150188	-0.350438	0.150188	1	#N/A	#N/A	#N/A	#N/A	#N/A	#N/A	#N/A	#N/A	#N/A	#N/A	#N/A	#N/A	#N/A	#N/A	#N/A	#N/A	#N/A	#N/A	#N/A	#N/A	#N/A
FEP	0	0.229416	-0.229416	-0.229416	0.436436	1	#N/A	#N/A	#N/A	#N/A	#N/A	#N/A	#N/A	#N/A	#N/A	#N/A	#N/A	#N/A	#N/A	#N/A	#N/A	#N/A	#N/A	#N/A	#N/A	#N/A
NA	0.19245	-0.132453	-0.39736	0.132453	0.125988	-0.11547	1	#N/A	#N/A	#N/A	#N/A	#N/A	#N/A	#N/A	#N/A	#N/A	#N/A	#N/A	#N/A	#N/A	#N/A	#N/A	#N/A	#N/A	#N/A	#N/A
CIP	0.25	-0.114708	-0.458831	0.114708	0.218218	0	0.866025	1	#N/A	#N/A	#N/A	#N/A	#N/A	#N/A	#N/A	#N/A	#N/A	#N/A	#N/A	#N/A	#N/A	#N/A	#N/A	#N/A	#N/A	#N/A
LVX	0.25	-0.114708	-0.458831	0.114708	0.218218	0	0.866025	1	1	#N/A	#N/A	#N/A	#N/A	#N/A	#N/A	#N/A	#N/A	#N/A	#N/A	#N/A	#N/A	#N/A	#N/A	#N/A	#N/A	#N/A
SXT	0.145479	-0.150188	-0.350438	0.150188	0.761905	0.654654	0.125988	0.218218	0.218218	1	#N/A	#N/A	#N/A	#N/A	#N/A	#N/A	#N/A	#N/A	#N/A	#N/A	#N/A	#N/A	#N/A	#N/A	#N/A	#N/A
TGC	0.104828	-0.168345	0.168345	-0.312641	-0.0228755	-0.104828	-0.423659	-0.3669	-0.3669	-0.0228755	1	#N/A	#N/A	#N/A	#N/A	#N/A	#N/A	#N/A	#N/A	#N/A	#N/A	#N/A	#N/A	#N/A	#N/A	#N/A
ATM	0.25	-0.114708	-0.458831	0.114708	0.763763	0.5	0.288675	0.375	0.375	0.763763	-0.104828	1	#N/A	#N/A	#N/A	#N/A	#N/A	#N/A	#N/A	#N/A	#N/A	#N/A	#N/A	#N/A	#N/A	#N/A
TPZ	0.218218	-0.350438	-0.150188	-0.150188	0.428571	0	-0.125988	-0.218218	-0.218218	0.428571	0.480384	0.327327	1	#N/A	#N/A	#N/A	#N/A	#N/A	#N/A	#N/A	#N/A	#N/A	#N/A	#N/A	#N/A	#N/A
AMC	0.0764719	0.0526316	-0.0526316	-0.0526316	0.150188	0.229416	0.132453	0.114708	0.114708	0.150188	0.168345	0.114708	0.350438	1	#N/A	#N/A	#N/A	#N/A	#N/A	#N/A	#N/A	#N/A	#N/A	#N/A	#N/A	#N/A
CHL	0.326732	-0.0963739	-0.546119	0.0963739	0.336123	0.140028	0.404226	0.490098	0.490098	0.336123	-0.0146789	0.490098	0.27501	0.0963739	1	#N/A	#N/A	#N/A	#N/A	#N/A	#N/A	#N/A	#N/A	#N/A	#N/A	#N/A
FOF	-0.0680414	0.187317	-0.187317	-0.187317	0.0890871	0.408248	0	-0.102062	-0.102062	0.0890871	-0.042796	0.408248	0.133631	0.280976	0.342997	1	#N/A	#N/A	#N/A	#N/A	#N/A	#N/A	#N/A	#N/A	#N/A	#N/A
TET	0.333333	-0.229416	-0.229416	0.229416	0.436436	-0.2	0.34641	0.25	0.25	0.218218	-0.104828	0.25	0	-0.229416	0.140028	-0.204124	1	#N/A	#N/A	#N/A	#N/A	#N/A	#N/A	#N/A	#N/A	#N/A
mcr1	0.444444	-0.0764719	-0.688247	0.0764719	0.145479	0	0.57735	0.666667	0.666667	0.145479	-0.2446	0.25	-0.145479	0.0764719	0.326732	-0.0680414	0.333333	1	#N/A	#N/A	#N/A	#N/A	#N/A	#N/A	#N/A	#N/A
mcr2	-0.272166	-0.187317	0.187317	0.187317	0.133631	0	-0.235702	-0.153093	-0.153093	0.356348	0.256776	0.102062	0.311805	0.187317	-0.0571662	-0.375	0.204124	-0.272166	1	#N/A	#N/A	#N/A	#N/A	#N/A	#N/A	#N/A
mcr3	0.0335013	0.253629	0.207514	-0.253629	-0.153522	0.100504	-0.0580259	-0.201008	-0.201008	-0.372839	-0.24232	-0.201008	-0.285112	-0.253629	-0.0985134	0.328244	-0.301511	-0.301511	-0.738549	1	#N/A	#N/A	#N/A	#N/A	#N/A	#N/A
mcr4	-0.0764719	-0.0526316	0.0526316	0.0526316	-0.150188	-0.229416	-0.132453	-0.114708	-0.114708	-0.150188	0.312641	-0.114708	0.150188	0.0526316	-0.0963739	0.187317	-0.229416	-0.0764719	-0.187317	-0.207514	1	#N/A	#N/A	#N/A	#N/A	#N/A
hlyF	-0.326732	-0.546119	-0.0963739	-0.0963739	-0.0305566	0.140028	-0.0808452	-0.140028	-0.140028	0.27501	0.0146789	0.210042	0.336123	-0.0963739	0.176471	0.228665	-0.140028	0.140028	0.0571662	-0.182953	0.0963739	1	#N/A	#N/A	#N/A	#N/A
ireA	0.2446	0.168345	-0.168345	0.312641	0.480384	0.104828	-0.0605228	0.104828	0.104828	0.25163	-0.340659	0.3669	-0.0228755	-0.168345	0.308257	0.042796	0.314485	-0.104828	0.171184	0.031607	-0.312641	-0.308257	1	#N/A	#N/A	#N/A
iroN	0.166667	0.114708	-0.114708	-0.114708	0.0545545	0	0.288675	0.25	0.25	0.0545545	0.104828	0.25	-0.0545545	-0.114708	-0.140028	0.102062	0	0.166667	-0.357217	0.201008	0.114708	-0.210042	-0.3669	1	#N/A	#N/A
iss	0.19245	0.132453	-0.132453	-0.132453	-0.125988	-0.11547	0.0666667	0.288675	0.288675	-0.125988	0.181568	-0.288675	-0.125988	-0.132453	0.242536	-0.471405	-0.11547	0.19245	0	-0.174078	0.132453	-0.242536	0.0605228	-0.288675	1	#N/A
traT	-0.0680414	-0.280976	-0.187317	-0.187317	0.0890871	0.204124	0	0.153093	0.153093	0.311805	-0.042796	0.153093	0.133631	0.280976	-0.228665	-0.0416667	0	0.272166	0.25	-0.492366	0.187317	0.228665	0.042796	-0.153093	0	1
Supplementary Table 2B: Significance values for the correlations between antimicrobial resistance phenotypes, colistin resistance genes (mcr) and virulence genes in E. coli isolates
	CN	TOB	FOX	CTX	CRO	FEP	NA.	CIP	LVX	SXT	TGC	ATM	TPZ	AMC	CHL	FOF	TET	mcr1	mcr2	mcr3	mcr4	hlyF	ireA	iroN	iss	traT
CN	#N/A	#N/A	#N/A	#N/A	#N/A	#N/A	#N/A	#N/A	#N/A	#N/A	#N/A	#N/A	#N/A	#N/A	#N/A	#N/A	#N/A	#N/A	#N/A	#N/A	#N/A	#N/A	#N/A	#N/A	#N/A	#N/A
TOB	0.748634	#N/A	#N/A	#N/A	#N/A	#N/A	#N/A	#N/A	#N/A	#N/A	#N/A	#N/A	#N/A	#N/A	#N/A	#N/A	#N/A	#N/A	#N/A	#N/A	#N/A	#N/A	#N/A	#N/A	#N/A	#N/A
FOX	0.000794488	0.825581	#N/A	#N/A	#N/A	#N/A	#N/A	#N/A	#N/A	#N/A	#N/A	#N/A	#N/A	#N/A	#N/A	#N/A	#N/A	#N/A	#N/A	#N/A	#N/A	#N/A	#N/A	#N/A	#N/A	#N/A
CTX	0.748634	0.825581	0.825581	#N/A	#N/A	#N/A	#N/A	#N/A	#N/A	#N/A	#N/A	#N/A	#N/A	#N/A	#N/A	#N/A	#N/A	#N/A	#N/A	#N/A	#N/A	#N/A	#N/A	#N/A	#N/A	#N/A
CRO	0.0218497	0.527378	0.129821	0.527378	#N/A	#N/A	#N/A	#N/A	#N/A	#N/A	#N/A	#N/A	#N/A	#N/A	#N/A	#N/A	#N/A	#N/A	#N/A	#N/A	#N/A	#N/A	#N/A	#N/A	#N/A	#N/A
FEP	1	0.330565	0.330565	0.330565	0.054371	#N/A	#N/A	#N/A	#N/A	#N/A	#N/A	#N/A	#N/A	#N/A	#N/A	#N/A	#N/A	#N/A	#N/A	#N/A	#N/A	#N/A	#N/A	#N/A	#N/A	#N/A
NA	0.416283	0.577753	0.0827608	0.577753	0.596616	0.627837	#N/A	#N/A	#N/A	#N/A	#N/A	#N/A	#N/A	#N/A	#N/A	#N/A	#N/A	#N/A	#N/A	#N/A	#N/A	#N/A	#N/A	#N/A	#N/A	#N/A
CIP	0.287763	0.630124	0.0418611	0.630124	0.355346	1	8.0393e-07	#N/A	#N/A	#N/A	#N/A	#N/A	#N/A	#N/A	#N/A	#N/A	#N/A	#N/A	#N/A	#N/A	#N/A	#N/A	#N/A	#N/A	#N/A	#N/A
LVX	0.287763	0.630124	0.0418611	0.630124	0.355346	1	8.0393e-07	0	#N/A	#N/A	#N/A	#N/A	#N/A	#N/A	#N/A	#N/A	#N/A	#N/A	#N/A	#N/A	#N/A	#N/A	#N/A	#N/A	#N/A	#N/A
SXT	0.540552	0.527378	0.129821	0.527378	9.47084e-05	0.00173543	0.596616	0.355346	0.355346	#N/A	#N/A	#N/A	#N/A	#N/A	#N/A	#N/A	#N/A	#N/A	#N/A	#N/A	#N/A	#N/A	#N/A	#N/A	#N/A	#N/A
TGC	0.660056	0.47803	0.47803	0.17957	0.923737	0.660056	0.062681	0.111554	0.111554	0.923737	#N/A	#N/A	#N/A	#N/A	#N/A	#N/A	#N/A	#N/A	#N/A	#N/A	#N/A	#N/A	#N/A	#N/A	#N/A	#N/A
ATM	0.287763	0.630124	0.0418611	0.630124	8.89179e-05	0.0247696	0.21707	0.103279	0.103279	8.89179e-05	0.660056	#N/A	#N/A	#N/A	#N/A	#N/A	#N/A	#N/A	#N/A	#N/A	#N/A	#N/A	#N/A	#N/A	#N/A	#N/A
TPZ	0.355346	0.129821	0.527378	0.527378	0.0593798	1	0.596616	0.355346	0.355346	0.0593798	0.0320447	0.158907	#N/A	#N/A	#N/A	#N/A	#N/A	#N/A	#N/A	#N/A	#N/A	#N/A	#N/A	#N/A	#N/A	#N/A
AMC	0.748634	0.825581	0.825581	0.825581	0.527378	0.330565	0.577753	0.630124	0.630124	0.527378	0.47803	0.630124	0.129821	#N/A	#N/A	#N/A	#N/A	#N/A	#N/A	#N/A	#N/A	#N/A	#N/A	#N/A	#N/A	#N/A
CHL	0.159711	0.686074	0.0127337	0.686074	0.147351	0.555985	0.0771127	0.0282581	0.0282581	0.147351	0.951023	0.0282581	0.2406	0.686074	#N/A	#N/A	#N/A	#N/A	#N/A	#N/A	#N/A	#N/A	#N/A	#N/A	#N/A	#N/A
FOF	0.775623	0.429057	0.429057	0.429057	0.708776	0.0739402	1	0.66853	0.66853	0.708776	0.857822	0.0739402	0.574345	0.230134	0.138738	#N/A	#N/A	#N/A	#N/A	#N/A	#N/A	#N/A	#N/A	#N/A	#N/A	#N/A
TET	0.15095	0.330565	0.330565	0.330565	0.054371	0.397873	0.134596	0.287763	0.287763	0.355346	0.660056	0.287763	1	0.330565	0.555985	0.388009	#N/A	#N/A	#N/A	#N/A	#N/A	#N/A	#N/A	#N/A	#N/A	#N/A
mcr1	0.0496078	0.748634	0.000794488	0.748634	0.540552	1	0.00768541	0.00132687	0.00132687	0.540552	0.298645	0.287763	0.540552	0.748634	0.159711	0.775623	0.15095	#N/A	#N/A	#N/A	#N/A	#N/A	#N/A	#N/A	#N/A	#N/A
mcr2	0.245696	0.429057	0.429057	0.429057	0.574345	1	0.317113	0.519326	0.519326	0.123034	0.274459	0.66853	0.180799	0.429057	0.810804	0.103279	0.388009	0.245696	#N/A	#N/A	#N/A	#N/A	#N/A	#N/A	#N/A	#N/A
mcr3	0.888491	0.28059	0.380004	0.28059	0.518142	0.67332	0.808009	0.395451	0.395451	0.105441	0.303313	0.395451	0.223053	0.28059	0.679456	0.157674	0.196394	0.196394	0.000200191	#N/A	#N/A	#N/A	#N/A	#N/A	#N/A	#N/A
mcr4	0.748634	0.825581	0.825581	0.825581	0.527378	0.330565	0.577753	0.630124	0.630124	0.527378	0.17957	0.630124	0.527378	0.825581	0.686074	0.429057	0.330565	0.748634	0.429057	0.380004	#N/A	#N/A	#N/A	#N/A	#N/A	#N/A
hlyF	0.159711	0.0127337	0.686074	0.686074	0.898241	0.555985	0.734741	0.555985	0.555985	0.2406	0.951023	0.374096	0.147351	0.686074	0.456722	0.332194	0.555985	0.555985	0.810804	0.440078	0.686074	#N/A	#N/A	#N/A	#N/A	#N/A
ireA	0.298645	0.47803	0.47803	0.17957	0.0320447	0.660056	0.799905	0.660056	0.660056	0.284527	0.141627	0.111554	0.923737	0.47803	0.186076	0.857822	0.17688	0.660056	0.470529	0.894762	0.17957	0.186076	#N/A	#N/A	#N/A	#N/A
iroN	0.482493	0.630124	0.630124	0.630124	0.819308	1	0.21707	0.287763	0.287763	0.819308	0.660056	0.287763	0.819308	0.630124	0.555985	0.66853	1	0.482493	0.122058	0.395451	0.630124	0.374096	0.111554	#N/A	#N/A	#N/A
iss	0.416283	0.577753	0.577753	0.577753	0.596616	0.627837	0.780049	0.21707	0.21707	0.596616	0.443608	0.21707	0.596616	0.577753	0.30287	0.035888	0.627837	0.416283	1	0.462946	0.577753	0.30287	0.799905	0.21707	#N/A	#N/A
traT	0.775623	0.230134	0.429057	0.429057	0.708776	0.388009	1	0.519326	0.519326	0.180799	0.857822	0.519326	0.574345	0.230134	0.332194	0.861539	1	0.245696	0.287763	0.0274269	0.429057	0.332194	0.857822	0.519326	1	#N/A

## Sheet: Sheet 2
	Supplementary Table 2C: Correlation analysis for antimicrobial resistance phenotypes, colistin resistance genes (mcr) and virulence genes in K. pneumoniae isolates
	TOB	CAZ	CTX	CRO	FEP	CIP	SXT	TGC	ATM	TPZ	CHL	TET	mcr1	mcr2	mcr3	alls	mrkD	fimH	ybtS	traT
TOB	1	0.125	0.125	0.125	-0.25	-0.125	-0.25	0.188982	-0.125	0.125	-0.125	0.5	-0.316228	0.5	-0.188982	-0.316228	0.125	0.125	0.188982	0.188982
CAZ	0.125	1	1	1	0.25	0.125	0.25	0.661438	0.125	1	0.125	0.25	-0.395285	0.25	0.188982	0.316228	-0.125	1	-0.188982	-0.188982
CTX	0.125	1	1	1	0.25	0.125	0.25	0.661438	0.125	1	0.125	0.25	-0.395285	0.25	0.188982	0.316228	-0.125	1	-0.188982	-0.188982
CRO	0.125	1	1	1	0.25	0.125	0.25	0.661438	0.125	1	0.125	0.25	-0.395285	0.25	0.188982	0.316228	-0.125	1	-0.188982	-0.188982
FEP	-0.25	0.25	0.25	0.25	1	-0.25	0	-0.188982	-0.25	0.25	-0.25	-0.5	0.316228	-0.5	0.188982	0.316228	0.25	0.25	-0.755929	0.377964
CIP	-0.125	0.125	0.125	0.125	-0.25	1	0.5	0.188982	-0.125	0.125	-0.125	0.5	-0.316228	0.5	-0.188982	-0.316228	0.125	0.125	0.188982	0.188982
SXT	-0.25	0.25	0.25	0.25	0	0.5	1	0.377964	0.5	0.25	0.5	0	-0.632456	0.5	0.188982	0.316228	0.25	0.25	-0.188982	-0.188982
TGC	0.188982	0.661438	0.661438	0.661438	-0.188982	0.188982	0.377964	1	0.188982	0.661438	0.188982	0.377964	-0.597614	0.377964	0.285714	-0.0597614	-0.188982	0.661438	0.357143	-0.285714
ATM	-0.125	0.125	0.125	0.125	-0.25	-0.125	0.5	0.188982	1	0.125	1	-0.25	-0.316228	0.5	-0.188982	0.395285	0.125	0.125	0.188982	-0.661438
TPZ	0.125	1	1	1	0.25	0.125	0.25	0.661438	0.125	1	0.125	0.25	-0.395285	0.25	0.188982	0.316228	-0.125	1	-0.188982	-0.188982
CHL	-0.125	0.125	0.125	0.125	-0.25	-0.125	0.5	0.188982	1	0.125	1	-0.25	-0.316228	0.5	-0.188982	0.395285	0.125	0.125	0.188982	-0.661438
TET	0.5	0.25	0.25	0.25	-0.5	0.5	0	0.377964	-0.25	0.25	-0.25	1	-0.632456	0.5	0.188982	-0.158114	0.25	0.25	0.377964	-0.188982
mcr1	-0.316228	-0.395285	-0.395285	-0.395285	0.316228	-0.316228	-0.632456	-0.597614	-0.316228	-0.395285	-0.316228	-0.632456	1	-0.632456	-0.478091	-0.35	-0.395285	-0.395285	-0.0597614	0.478091
mcr2	0.5	0.25	0.25	0.25	-0.5	0.5	0.5	0.377964	0.5	0.25	0.5	0.5	-0.632456	1	-0.377964	-0.158114	0.25	0.25	0.377964	-0.188982
mcr3	-0.188982	0.188982	0.188982	0.188982	0.188982	-0.188982	0.188982	0.285714	-0.188982	0.188982	-0.188982	0.188982	-0.478091	-0.377964	1	0.597614	0.188982	0.188982	-0.357143	-0.357143
alls	-0.316228	0.316228	0.316228	0.316228	0.316228	-0.316228	0.316228	-0.0597614	0.395285	0.316228	0.395285	-0.158114	-0.35	-0.158114	0.597614	1	0.316228	0.316228	-0.597614	-0.597614
mrkD	0.125	-0.125	-0.125	-0.125	0.25	0.125	0.25	-0.188982	0.125	-0.125	0.125	0.25	-0.395285	0.25	0.188982	0.316228	1	-0.125	-0.188982	-0.188982
fimH	0.125	1	1	1	0.25	0.125	0.25	0.661438	0.125	1	0.125	0.25	-0.395285	0.25	0.188982	0.316228	-0.125	1	-0.188982	-0.188982
ybtS	0.188982	-0.188982	-0.188982	-0.188982	-0.755929	0.188982	-0.188982	0.357143	0.188982	-0.188982	0.188982	0.377964	-0.0597614	0.377964	-0.357143	-0.597614	-0.188982	-0.188982	1	-0.285714
traT	0.188982	-0.188982	-0.188982	-0.188982	0.377964	0.188982	-0.188982	-0.285714	-0.661438	-0.188982	-0.661438	-0.188982	0.478091	-0.188982	-0.357143	-0.597614	-0.188982	-0.188982	-0.285714	1
Supplementary Table 2D: Significance values for the correlations between antimicrobial resistance phenotypes, colistin resistance genes (mcr) and virulence genes in K. pneumoniae isolates
	TOB	CAZ	CTX	CRO	FEP	CIP	SXT	TGC	ATM	TPZ	CHL	TET	mcr1	mcr2	mcr3	alls	mrkD	fimH	ybtS	traT
TOB	#N/A	0.748645	0.748645	0.748645	0.51649	0.748645	0.51649	0.626283	0.748645	0.748645	0.748645	0.170471	0.407084	0.170471	0.626283	0.407084	0.748645	0.748645	0.626283	0.626283
CAZ		#N/A	0	0	0.51649	0.748645	0.51649	0.0523563	0.748645	0	0.748645	0.51649	0.292352	0.51649	0.626283	0.407084	0.748645	0	0.626283	0.626283
CTX			#N/A	0	0.51649	0.748645	0.51649	0.0523563	0.748645	0	0.748645	0.51649	0.292352	0.51649	0.626283	0.407084	0.748645	0	0.626283	0.626283
CRO				#N/A	0.51649	0.748645	0.51649	0.0523563	0.748645	0	0.748645	0.51649	0.292352	0.51649	0.626283	0.407084	0.748645	0	0.626283	0.626283
FEP					#N/A	0.51649	1	0.626283	0.51649	0.51649	0.51649	0.170471	0.407084	0.170471	0.626283	0.407084	0.51649	0.51649	0.0184515	0.315891
CIP						#N/A	0.170471	0.626283	0.748645	0.748645	0.748645	0.170471	0.407084	0.170471	0.626283	0.407084	0.748645	0.748645	0.626283	0.626283
SXT							#N/A	0.315891	0.170471	0.51649	0.170471	1	0.0675833	0.170471	0.626283	0.407084	0.51649	0.51649	0.626283	0.626283
TGC								#N/A	0.626283	0.0523563	0.626283	0.315891	0.0892243	0.315891	0.456103	0.878617	0.626283	0.0523563	0.345399	0.456103
ATM									#N/A	0.748645	0	0.51649	0.407084	0.170471	0.626283	0.292352	0.748645	0.748645	0.626283	0.0523563
TPZ										#N/A	0.748645	0.51649	0.292352	0.51649	0.626283	0.407084	0.748645	0	0.626283	0.626283
CHL											#N/A	0.51649	0.407084	0.170471	0.626283	0.292352	0.748645	0.748645	0.626283	0.0523563
TET												#N/A	0.0675833	0.170471	0.626283	0.684528	0.51649	0.51649	0.315891	0.626283
mcr1													#N/A	0.0675833	0.193006	0.35582	0.292352	0.292352	0.878617	0.193006
mcr2														#N/A	0.315891	0.684528	0.51649	0.51649	0.315891	0.626283
mcr3															#N/A	0.0892243	0.626283	0.626283	0.345399	0.345399
alls																#N/A	0.407084	0.407084	0.0892243	0.0892243
mrkD																	#N/A	0.748645	0.626283	0.626283
fimH																		#N/A	0.626283	0.626283
ybtS																			#N/A	0.456103
traT																				#N/A

## Sheet: Sheet3
Supplementary Table 2E: Correlation analysis for antimicrobial resistance phenotypes, colistin resistance genes (mcr) and virulence genes in P. aeruginosa isolates
	AK	CN	TOB	CAZ	CTX	CRO	FEP	NA.	CIP	LVX	TGC	mcr1	mcr2	mcr3	mcr7	exoU	exoS	lasB	phzM
AK	1	1	0	0	0.57735	0.57735	0.57735	0.377964	0.57735	0.57735	0.5	-0.258199	0.377964	0.258199	-0.377964	0.57735	0.377964	-0.377964	0.57735
CN	1	1	0	0	0.57735	0.57735	0.57735	0.377964	0.57735	0.57735	0.5	-0.258199	0.377964	0.258199	-0.377964	0.57735	0.377964	-0.377964	0.57735
TOB	0	0	1	0	0	0	-0.57735	-0.377964	-0.57735	-0.57735	-0.5	0.258199	0.377964	-0.258199	-0.377964	0	-0.377964	-0.377964	0
CAZ	0	0	0	1	0	-0.57735	0	0.377964	0	0	0	0.258199	-0.377964	-0.258199	0.377964	0	0.377964	-0.377964	-0.57735
CTX	0.57735	0.57735	0	0	1	0.333333	0.333333	0.218218	0.333333	0.333333	0.57735	0.149071	0.654654	-0.447214	-0.218218	0.333333	0.218218	0.218218	0.333333
CRO	0.57735	0.57735	0	-0.57735	0.333333	1	0.333333	0.218218	0.333333	0.333333	0.57735	-0.447214	0.654654	0.149071	-0.218218	0.333333	0.218218	0.218218	1
FEP	0.57735	0.57735	-0.57735	0	0.333333	0.333333	1	0.218218	0.333333	0.333333	0.57735	0.149071	-0.218218	0.149071	-0.218218	0.333333	0.218218	0.218218	0.333333
NA	0.377964	0.377964	-0.377964	0.377964	0.218218	0.218218	0.218218	1	0.654654	0.654654	0.377964	-0.48795	0.142857	0.29277	0.142857	-0.218218	1	-0.142857	0.218218
CIP	0.57735	0.57735	-0.57735	0	0.333333	0.333333	0.333333	0.654654	1	1	0.57735	-0.745356	0.218218	0.447214	0.218218	0.333333	0.654654	-0.218218	0.333333
LVX	0.57735	0.57735	-0.57735	0	0.333333	0.333333	0.333333	0.654654	1	1	0.57735	-0.745356	0.218218	0.447214	0.218218	0.333333	0.654654	-0.218218	0.333333
TGC	0.5	0.5	-0.5	0	0.57735	0.57735	0.57735	0.377964	0.57735	0.57735	1	-0.258199	0.377964	-0.258199	0.377964	0.57735	0.377964	0.377964	0.57735
mcr1	-0.258199	-0.258199	0.258199	0.258199	0.149071	-0.447214	0.149071	-0.48795	-0.745356	-0.745356	-0.258199	1	-0.29277	-0.6	-0.29277	-0.149071	-0.48795	0.29277	-0.447214
mcr2	0.377964	0.377964	0.377964	-0.377964	0.654654	0.654654	-0.218218	0.142857	0.218218	0.218218	0.377964	-0.29277	1	-0.29277	-0.142857	0.218218	0.142857	0.142857	0.654654
mcr3	0.258199	0.258199	-0.258199	-0.258199	-0.447214	0.149071	0.149071	0.29277	0.447214	0.447214	-0.258199	-0.6	-0.29277	1	-0.29277	-0.149071	0.29277	-0.48795	0.149071
mcr7	-0.377964	-0.377964	-0.377964	0.377964	-0.218218	-0.218218	-0.218218	0.142857	0.218218	0.218218	0.377964	-0.29277	-0.142857	-0.29277	1	0.218218	0.142857	0.142857	-0.218218
exoU	0.57735	0.57735	0	0	0.333333	0.333333	0.333333	-0.218218	0.333333	0.333333	0.57735	-0.149071	0.218218	-0.149071	0.218218	1	-0.218218	-0.218218	0.333333
exoS	0.377964	0.377964	-0.377964	0.377964	0.218218	0.218218	0.218218	1	0.654654	0.654654	0.377964	-0.48795	0.142857	0.29277	0.142857	-0.218218	1	-0.142857	0.218218
lasB	-0.377964	-0.377964	-0.377964	-0.377964	0.218218	0.218218	0.218218	-0.142857	-0.218218	-0.218218	0.377964	0.29277	0.142857	-0.48795	0.142857	-0.218218	-0.142857	1	0.218218
phzM	0.57735	0.57735	0	-0.57735	0.333333	1	0.333333	0.218218	0.333333	0.333333	0.57735	-0.447214	0.654654	0.149071	-0.218218	0.333333	0.218218	0.218218	1
Supplementary Table 2F: Significance values for the correlation between antimicrobial resistance phenotypes, colistin resistance genes (mcr) and virulence genes in P. aeruginosa isolates
	AK	CN	TOB	CAZ	CTX	CRO	FEP	NA.	CIP	LVX	TGC	mcr1	mcr2	mcr3	mcr7	exoU	exoS	lasB	phzM
AK	#N/A	0	1	1	0.133975	0.133975	0.133975	0.355918	0.133975	0.133975	0.207031	0.536963	0.355918	0.536963	0.355918	0.133975	0.355918	0.355918	0.133975
CN	0	#N/A	1	1	0.133975	0.133975	0.133975	0.355918	0.133975	0.133975	0.207031	0.536963	0.355918	0.536963	0.355918	0.133975	0.355918	0.355918	0.133975
TOB	1	1	#N/A	1	1	1	0.133975	0.355918	0.133975	0.133975	0.207031	0.536963	0.355918	0.536963	0.355918	1	0.355918	0.355918	1
CAZ	1	1	1	#N/A	1	0.133975	1	0.355918	1	1	1	0.536963	0.355918	0.536963	0.355918	1	0.355918	0.355918	0.133975
CTX	0.133975	0.133975	1	1	#N/A	0.419753	0.419753	0.603645	0.419753	0.419753	0.133975	0.724605	0.0781407	0.26657	0.603645	0.419753	0.603645	0.603645	0.419753
CRO	0.133975	0.133975	1	0.133975	0.419753	#N/A	0.419753	0.603645	0.419753	0.419753	0.133975	0.26657	0.0781407	0.724605	0.603645	0.419753	0.603645	0.603645	0
FEP	0.133975	0.133975	0.133975	1	0.419753	0.419753	#N/A	0.603645	0.419753	0.419753	0.133975	0.724605	0.603645	0.724605	0.603645	0.419753	0.603645	0.603645	0.419753
NA	0.355918	0.355918	0.355918	0.355918	0.603645	0.603645	0.603645	#N/A	0.0781407	0.0781407	0.355918	0.219944	0.735765	0.481618	0.735765	0.603645	0	0.735765	0.603645
CIP	0.133975	0.133975	0.133975	1	0.419753	0.419753	0.419753	0.0781407	#N/A	0	0.133975	0.0337978	0.603645	0.26657	0.603645	0.419753	0.0781407	0.603645	0.419753
LVX	0.133975	0.133975	0.133975	1	0.419753	0.419753	0.419753	0.0781407	0	#N/A	0.133975	0.0337978	0.603645	0.26657	0.603645	0.419753	0.0781407	0.603645	0.419753
TGC	0.207031	0.207031	0.207031	1	0.133975	0.133975	0.133975	0.355918	0.133975	0.133975	#N/A	0.536963	0.355918	0.536963	0.355918	0.133975	0.355918	0.355918	0.133975
mcr1	0.536963	0.536963	0.536963	0.536963	0.724605	0.26657	0.724605	0.219944	0.0337978	0.0337978	0.536963	#N/A	0.481618	0.11584	0.481618	0.724605	0.219944	0.481618	0.26657
mcr2	0.355918	0.355918	0.355918	0.355918	0.0781407	0.0781407	0.603645	0.735765	0.603645	0.603645	0.355918	0.481618	#N/A	0.481618	0.735765	0.603645	0.735765	0.735765	0.0781407
mcr3	0.536963	0.536963	0.536963	0.536963	0.26657	0.724605	0.724605	0.481618	0.26657	0.26657	0.536963	0.11584	0.481618	#N/A	0.481618	0.724605	0.481618	0.219944	0.724605
mcr7	0.355918	0.355918	0.355918	0.355918	0.603645	0.603645	0.603645	0.735765	0.603645	0.603645	0.355918	0.481618	0.735765	0.481618	#N/A	0.603645	0.735765	0.735765	0.603645
exoU	0.133975	0.133975	1	1	0.419753	0.419753	0.419753	0.603645	0.419753	0.419753	0.133975	0.724605	0.603645	0.724605	0.603645	#N/A	0.603645	0.603645	0.419753
exoS	0.355918	0.355918	0.355918	0.355918	0.603645	0.603645	0.603645	0	0.0781407	0.0781407	0.355918	0.219944	0.735765	0.481618	0.735765	0.603645	#N/A	0.735765	0.603645
lasB	0.355918	0.355918	0.355918	0.355918	0.603645	0.603645	0.603645	0.735765	0.603645	0.603645	0.355918	0.481618	0.735765	0.219944	0.735765	0.603645	0.735765	#N/A	0.603645
phzM	0.133975	0.133975	1	0.133975	0.419753	0	0.419753	0.603645	0.419753	0.419753	0.133975	0.26657	0.0781407	0.724605	0.603645	0.419753	0.603645	0.603645	#N/A

## Sheet: Sheet4
Supplementary Table 2G: Correlation analysis for antimicrobial resistance phenotypes, colistin resistance genes (mcr) and virulence genes in A.hydrophila isolates
	CN	TOB	CFZ	FEP	NA.	SXT	TGC	ATM	AM	TPZ	AMC	CHL	FOF	mcr1	mcr2	mcr3	hlyA	aer	lip	ast	act
CN	1	0.218218	-0.218218	-0.327327	-0.509175	-0.509175	0.047619	0.218218	-0.0890871	0.509175	0.218218	0.356348	0.509175	-0.218218	0.218218	0.047619	0.509175	0.428571	0.047619	-0.218218	-0.327327
TOB	0.218218	1	0	0.375	0.166667	0.166667	-0.327327	0	0.102062	0.666667	0.5	0.612372	-0.166667	0.5	-0.25	-0.327327	0.666667	0.327327	0.218218	-0.166667	-0.25
CFZ	-0.218218	0	1	0	0.333333	0.333333	-0.218218	0.6	0	-0.333333	-0.2	-0.408248	-0.333333	0.2	-0.5	0.218218	-0.333333	-0.218218	-0.218218	0.333333	0.5
FEP	-0.327327	0.375	0	1	0.166667	0.166667	0.218218	-0.5	0.102062	-0.166667	0	0.102062	-0.166667	0	0.375	-0.327327	-0.166667	0.327327	0.218218	-0.166667	-0.25
NA	-0.509175	0.166667	0.333333	0.166667	1	1	-0.509175	0.333333	-0.408248	0.111111	-0.333333	-0.408248	-1	0.333333	-0.666667	0.218218	0.111111	-0.218218	-0.509175	0.111111	0.166667
SXT	-0.509175	0.166667	0.333333	0.166667	1	1	-0.509175	0.333333	-0.408248	0.111111	-0.333333	-0.408248	-1	0.333333	-0.666667	0.218218	0.111111	-0.218218	-0.509175	0.111111	0.166667
TGC	0.047619	-0.327327	-0.218218	0.218218	-0.509175	-0.509175	1	-0.218218	-0.0890871	-0.218218	-0.218218	-0.0890871	0.509175	-0.218218	0.763763	-0.428571	-0.218218	0.428571	0.047619	0.509175	-0.327327
ATM	0.218218	0	0.6	-0.5	0.333333	0.333333	-0.218218	1	-0.408248	0.333333	-0.2	-0.408248	-0.333333	0.2	-0.5	0.218218	0.333333	-0.218218	-0.654654	0.333333	0.5
AM	-0.0890871	0.102062	0	0.102062	-0.408248	-0.408248	-0.0890871	-0.408248	1	-0.272166	0.408248	0.583333	0.408248	0.408248	0.102062	-0.534522	-0.272166	0.0890871	0.356348	-0.272166	0.102062
TPZ	0.509175	0.666667	-0.333333	-0.166667	0.111111	0.111111	-0.218218	0.333333	-0.272166	1	0.333333	0.408248	-0.111111	0.333333	-0.166667	-0.218218	1	0.218218	-0.218218	-0.111111	-0.166667
AMC	0.218218	0.5	-0.2	0	-0.333333	-0.333333	-0.218218	-0.2	0.408248	0.333333	1	0.816497	0.333333	0.2	0	-0.218218	0.333333	0.218218	0.218218	-0.333333	0
CHL	0.356348	0.612372	-0.408248	0.102062	-0.408248	-0.408248	-0.0890871	-0.408248	0.583333	0.408248	0.816497	1	0.408248	0.408248	0.102062	-0.534522	0.408248	0.534522	0.356348	-0.272166	-0.408248
FOF	0.509175	-0.166667	-0.333333	-0.166667	-1	-1	0.509175	-0.333333	0.408248	-0.111111	0.333333	0.408248	1	-0.333333	0.666667	-0.218218	-0.111111	0.218218	0.509175	-0.111111	-0.166667
mcr1	-0.218218	0.5	0.2	0	0.333333	0.333333	-0.218218	0.2	0.408248	0.333333	0.2	0.408248	-0.333333	1	-0.5	-0.654654	0.333333	0.218218	-0.218218	0.333333	0
mcr2	0.218218	-0.25	-0.5	0.375	-0.666667	-0.666667	0.763763	-0.5	0.102062	-0.166667	0	0.102062	0.666667	-0.5	1	-0.327327	-0.166667	0.327327	0.218218	-0.166667	-0.25
mcr3	0.047619	-0.327327	0.218218	-0.327327	0.218218	0.218218	-0.428571	0.218218	-0.534522	-0.218218	-0.218218	-0.534522	-0.218218	-0.654654	-0.327327	1	-0.218218	-0.52381	0.047619	-0.218218	0.218218
hlyA	0.509175	0.666667	-0.333333	-0.166667	0.111111	0.111111	-0.218218	0.333333	-0.272166	1	0.333333	0.408248	-0.111111	0.333333	-0.166667	-0.218218	1	0.218218	-0.218218	-0.111111	-0.166667
aer	0.428571	0.327327	-0.218218	0.327327	-0.218218	-0.218218	0.428571	-0.218218	0.0890871	0.218218	0.218218	0.534522	0.218218	0.218218	0.327327	-0.52381	0.218218	1	-0.047619	0.218218	-0.763763
lip	0.047619	0.218218	-0.218218	0.218218	-0.509175	-0.509175	0.047619	-0.654654	0.356348	-0.218218	0.218218	0.356348	0.509175	-0.218218	0.218218	0.047619	-0.218218	-0.047619	1	-0.218218	-0.327327
ast	-0.218218	-0.166667	0.333333	-0.166667	0.111111	0.111111	0.509175	0.333333	-0.272166	-0.111111	-0.333333	-0.272166	-0.111111	0.333333	-0.166667	-0.218218	-0.111111	0.218218	-0.218218	1	-0.166667
act	-0.327327	-0.25	0.5	-0.25	0.166667	0.166667	-0.327327	0.5	0.102062	-0.166667	0	-0.408248	-0.166667	0	-0.25	0.218218	-0.166667	-0.763763	-0.327327	-0.166667	1
Supplementary Table 2H: Significance values for the correlation between antimicrobial resistance phenotypes, colistin resistance genes (mcr) and virulence genes in A.hydrophila isolates
	CN	TOB	CFZ	FEP	NA.	SXT	TGC	ATM	AM	TPZ	AMC	CHL	FOF	mcr1	mcr2	mcr3	hlyA	aer	lip	ast	act
CN	#N/A	0.544737	0.544737	0.355884	0.132801	0.132801	0.896069	0.544737	0.806661	0.132801	0.544737	0.31216	0.132801	0.544737	0.544737	0.896069	0.132801	0.216547	0.896069	0.544737	0.355884
TOB	0.544737	#N/A	1	0.285637	0.645376	0.645376	0.355884	1	0.77905	0.0352652	0.141113	0.0598379	0.645376	0.141113	0.486042	0.355884	0.0352652	0.355884	0.544737	0.645376	0.486042
CFZ	0.544737	1	#N/A	1	0.346594	0.346594	0.544737	0.066688	1	0.346594	0.579584	0.241504	0.346594	0.579584	0.141113	0.544737	0.346594	0.544737	0.544737	0.346594	0.141113
FEP	0.355884	0.285637	1	#N/A	0.645376	0.645376	0.544737	0.141113	0.77905	0.645376	1	0.77905	0.645376	1	0.285637	0.355884	0.645376	0.355884	0.544737	0.645376	0.486042
NA	0.132801	0.645376	0.346594	0.645376	#N/A	0	0.132801	0.346594	0.241504	0.759923	0.346594	0.241504	0	0.346594	0.0352652	0.544737	0.759923	0.544737	0.132801	0.759923	0.645376
SXT	0.132801	0.645376	0.346594	0.645376	0	#N/A	0.132801	0.346594	0.241504	0.759923	0.346594	0.241504	0	0.346594	0.0352652	0.544737	0.759923	0.544737	0.132801	0.759923	0.645376
TGC	0.896069	0.355884	0.544737	0.544737	0.132801	0.132801	#N/A	0.544737	0.806661	0.544737	0.544737	0.806661	0.132801	0.544737	0.0101307	0.216547	0.544737	0.216547	0.896069	0.132801	0.355884
ATM	0.544737	1	0.066688	0.141113	0.346594	0.346594	0.544737	#N/A	0.241504	0.346594	0.579584	0.241504	0.346594	0.579584	0.141113	0.544737	0.346594	0.544737	0.0399685	0.346594	0.141113
AM	0.806661	0.77905	1	0.77905	0.241504	0.241504	0.806661	0.241504	#N/A	0.446813	0.241504	0.0766984	0.241504	0.241504	0.77905	0.111434	0.446813	0.806661	0.31216	0.446813	0.77905
TPZ	0.132801	0.0352652	0.346594	0.645376	0.759923	0.759923	0.544737	0.346594	0.446813	#N/A	0.346594	0.241504	0.759923	0.346594	0.645376	0.544737	0	0.544737	0.544737	0.759923	0.645376
AMC	0.544737	0.141113	0.579584	1	0.346594	0.346594	0.544737	0.579584	0.241504	0.346594	#N/A	0.00394977	0.346594	0.579584	1	0.544737	0.346594	0.544737	0.544737	0.346594	1
CHL	0.31216	0.0598379	0.241504	0.77905	0.241504	0.241504	0.806661	0.241504	0.0766984	0.241504	0.00394977	#N/A	0.241504	0.241504	0.77905	0.111434	0.241504	0.111434	0.31216	0.446813	0.241504
FOF	0.132801	0.645376	0.346594	0.645376	0	0	0.132801	0.346594	0.241504	0.759923	0.346594	0.241504	#N/A	0.346594	0.0352652	0.544737	0.759923	0.544737	0.132801	0.759923	0.645376
mcr1	0.544737	0.141113	0.579584	1	0.346594	0.346594	0.544737	0.579584	0.241504	0.346594	0.579584	0.241504	0.346594	#N/A	0.141113	0.0399685	0.346594	0.544737	0.544737	0.346594	1
mcr2	0.544737	0.486042	0.141113	0.285637	0.0352652	0.0352652	0.0101307	0.141113	0.77905	0.645376	1	0.77905	0.0352652	0.141113	#N/A	0.355884	0.645376	0.355884	0.544737	0.645376	0.486042
mcr3	0.896069	0.355884	0.544737	0.355884	0.544737	0.544737	0.216547	0.544737	0.111434	0.544737	0.544737	0.111434	0.544737	0.0399685	0.355884	#N/A	0.544737	0.120181	0.896069	0.544737	0.544737
hlyA	0.132801	0.0352652	0.346594	0.645376	0.759923	0.759923	0.544737	0.346594	0.446813	0	0.346594	0.241504	0.759923	0.346594	0.645376	0.544737	#N/A	0.544737	0.544737	0.759923	0.645376
aer	0.216547	0.355884	0.544737	0.355884	0.544737	0.544737	0.216547	0.544737	0.806661	0.544737	0.544737	0.111434	0.544737	0.544737	0.355884	0.120181	0.544737	#N/A	0.896069	0.544737	0.0101307
lip	0.896069	0.544737	0.544737	0.544737	0.132801	0.132801	0.896069	0.0399685	0.31216	0.544737	0.544737	0.31216	0.132801	0.544737	0.544737	0.896069	0.544737	0.896069	#N/A	0.544737	0.355884
ast	0.544737	0.645376	0.346594	0.645376	0.759923	0.759923	0.132801	0.346594	0.446813	0.759923	0.346594	0.446813	0.759923	0.346594	0.645376	0.544737	0.759923	0.544737	0.544737	#N/A	0.645376
act	0.355884	0.486042	0.141113	0.486042	0.645376	0.645376	0.355884	0.141113	0.77905	0.645376	1	0.241504	0.645376	1	0.486042	0.544737	0.645376	0.0101307	0.355884	0.645376	#N/A
